# Supplementary material for: Serum microRNA Biomarkers for Detection of Non-Small Cell Lung Cancer
Source: PLoS One. 2012 Feb 28;7(2):e32307. doi: 10.1371/journal.pone.0032307 (PMC3289652; doi:10.1371/journal.pone.0032307)
Supplement: Figure S1 — Differential miRNA expression in sera from NSCLC patients (cancer) and healthy controls (normal) in training set. Diff, differential expression between the two miRNAs, calculated as the difference between Ct values of the two indicated miRNAs. PPV, positive predictive value; NPV, negative predictive value; SENS, sensitivity; and SPEC, specificity. The cutoff value used to achieve the indicated specificity and sensitivity is indicated for each miRNA diff pair. (XLS) [file pone.0032307.s001.xls]

## Sheet: Sheet1
Supplementary Table 1
miRpair	actual_cutoff	PPV	NPV	SENS	SPEC	Fishers.P-value
Diff(106a,106b)	0.890391	1	1	1	1	2.12183e-14
Diff(106a,142-3p)	-1.29628	1	1	1	1	2.12183e-14
Diff(106a,301)	4.16869	1	1	1	1	2.12183e-14
Diff(106a,422b)	3.55222	1	1	1	1	2.12183e-14
Diff(106a,15b)	1.66436	1	1	1	1	5.97526e-14
Diff(106a,182)	6.01722	1	1	1	1	1.02433e-13
Diff(106a,181c)	6.5683	1	0.952381	0.966667	1	4.45584e-13
Diff(106a,15a)	4.10288	0.967742	1	1	0.95	6.57766e-13
Diff(106a,126)	-0.907823	1	0.952381	0.964286	1	1.2548e-12
Diff(106b,30e-5p)	-1.89223	1	1	1	1	1.54649e-12
Diff(106a,26b)	-0.245158	0.964286	0.95	0.964286	0.95	3.35212e-11
Diff(106b,30a-5p)	-0.222102	0.935484	0.947368	0.966667	0.9	1.88121e-10
Diff(106a,150)	0.839231	1	0.833333	0.866667	1	2.25465e-10
Diff(106b,182)	4.70396	0.961538	0.904762	0.925926	0.95	5.61435e-10
Diff(106b,15b)	0.431595	0.928571	0.9	0.928571	0.9	4.32495e-09
Diff(106b,25)	-0.198484	0.961538	0.791667	0.833333	0.95	2.85589e-08
Diff(106a,92)	-4.08805	0.928571	0.818182	0.866667	0.9	5.95898e-08
Diff(106a,324-3p)	5.04617	0.933333	0.857143	0.933333	0.857143	3.48012e-07
Diff(106a,30b)	1.10903	0.892857	0.772727	0.833333	0.85	1.95604e-06
Diff(106a,660)	2.51267	0.925926	0.75	0.833333	0.882353	2.03337e-06
Diff(126,126pound)	-0.446291	1	0.952381	0.964286	1	1.2548e-12
Diff(126,30e-5p)	-3.02148	1	1	1	1	3.77099e-12
Diff(126,30a-5p)	-1.04226	1	0.909091	0.928571	1	1.38028e-11
Diff(126,27b)	-5.69369	1	0.9375	0.964286	1	1.05588e-10
Diff(126,30d)	-2.88973	0.964286	0.9375	0.964286	0.9375	1.07748e-09
Diff(126,27a)	-3.31073	1	0.818182	0.857143	1	2.59493e-09
Diff(126,182)	6.74674	0.954545	0.826087	0.84	0.95	7.32623e-08
Diff(126,142-3p)	0.01664	0.92	0.782609	0.821429	0.9	8.63083e-07
Diff(126pound,15b)	1.35791	1	1	1	1	5.97526e-14
Diff(126pound,182)	6.26449	1	1	1	1	1.02433e-13
Diff(126pound,142-3p)	-0.560976	1	0.909091	0.933333	1	4.90142e-12
Diff(126pound,422b)	3.90487	0.966667	0.95	0.966667	0.95	1.27522e-11
Diff(126pound,30e-5p)	-2.91619	0.966667	1	1	0.9375	4.63946e-11
Diff(126pound,181c)	6.86148	0.965517	0.904762	0.933333	0.95	1.29665e-10
Diff(126pound,15a)	4.74618	0.90625	0.944444	0.966667	0.85	1.90489e-09
Diff(126pound,26b)	-0.197594	0.961538	0.863636	0.892857	0.95	2.4063e-09
Diff(126pound,30d)	-2.20852	0.928571	0.777778	0.866667	0.875	1.1898e-06
Diff(142-3p,30a-5p)	-1.7368	1	1	1	1	2.12183e-14
Diff(142-3p,27a)	-3.55269	1	1	1	1	1.36802e-13
Diff(142-3p,30e-5p)	-3.44596	1	1	1	1	1.54649e-12
Diff(142-3p,27b)	-5.77398	1	1	1	1	2.89966e-12
Diff(142-3p,30d)	-2.62147	1	0.888889	0.933333	1	1.54313e-10
Diff(142-3p,660)	-3.10739	1	0.85	0.9	1	4.15878e-10
Diff(142-3p,25)	-2.36586	0.964286	0.863636	0.9	0.95	9.19833e-10
Diff(142-3p,92)	3.30299	0.903226	0.894737	0.933333	0.85	1.64974e-08
Diff(150,30e-5p)	-1.19935	1	0.941176	0.965517	1	2.62903e-11
Diff(150,30d)	-0.966818	0.962963	0.789474	0.866667	0.9375	1.06527e-07
Diff(150,182)	4.68356	0.888889	0.85	0.888889	0.85	4.39413e-07
Diff(15a,30a-5p)	4.07036	1	0.952381	0.966667	1	4.45584e-13
Diff(15a,30e-5p)	1.89126	1	1	1	1	1.54649e-12
Diff(15a,30d)	2.8086	1	0.888889	0.933333	1	1.54313e-10
Diff(15a,25)	3.68789	1	0.833333	0.866667	1	2.25465e-10
Diff(15a,27a)	2.06505	0.964286	0.85	0.9	0.944444	4.39271e-09
Diff(15a,27b)	0.101709	0.962963	0.777778	0.866667	0.933333	2.41936e-07
Diff(15a,660)	2.49863	0.928571	0.789474	0.866667	0.882353	5.44447e-07
Diff(15b,30a-5p)	0.695717	1	1	1	1	5.97526e-14
Diff(15b,27a)	-1.81579	1	1	1	1	3.54742e-13
Diff(15b,30d)	-0.850607	1	1	1	1	2.39972e-12
Diff(15b,30e-5p)	-0.687447	1	1	1	1	3.77099e-12
Diff(15b,27b)	-3.14618	1	1	1	1	6.59924e-12
Diff(15b,25)	-0.061088	1	0.909091	0.928571	1	1.38028e-11
Diff(15b,30b)	0.481324	0.964286	0.95	0.964286	0.95	3.35212e-11
Diff(15b,422a)	-4.59414	0.964286	0.947368	0.964286	0.947368	7.64355e-11
Diff(15b,660)	-1.13143	0.964286	0.941176	0.964286	0.941176	4.3243e-10
Diff(15b,92)	5.32233	0.931034	0.947368	0.964286	0.9	4.62664e-10
Diff(15b,324-3p)	-3.80391	0.961538	0.8125	0.892857	0.928571	2.77714e-07
Diff(15b,301)	-2.93916	0.888889	0.809524	0.857143	0.85	1.12733e-06
Diff(181c,27b)	2.18428	1	1	1	1	2.89966e-12
Diff(181c,30a-5p)	6.47055	1	0.909091	0.933333	1	4.90142e-12
Diff(181c,30e-5p)	4.81613	1	0.941176	0.965517	1	2.62903e-11
Diff(181c,30d)	4.65297	0.967742	1	1	0.9375	3.1266e-11
Diff(181c,27a)	4.18065	0.935484	0.941176	0.966667	0.888889	1.08566e-09
Diff(181c,422a)	0.51756	0.933333	0.894737	0.933333	0.894737	3.97609e-09
Diff(181c,25)	5.89623	0.961538	0.791667	0.833333	0.95	2.85589e-08
Diff(181c,660)	4.35421	0.962963	0.8	0.866667	0.941176	4.81379e-08
Diff(182,25)	3.77081	1	1	1	1	1.02433e-13
Diff(182,30a-5p)	5.04859	1	1	1	1	1.02433e-13
Diff(182,92)	10.2739	1	0.952381	0.962963	1	2.15109e-12
Diff(182,30e-5p)	3.88668	1	1	1	1	3.77099e-12
Diff(182,422a)	-0.252433	0.964286	1	1	0.947368	6.74009e-12
Diff(182,27b)	1.20669	1	1	1	1	1.01345e-11
Diff(182,27a)	2.69932	0.964286	1	1	0.944444	1.63181e-11
Diff(182,660)	3.32206	0.964286	1	1	0.941176	4.07953e-11
Diff(182,30d)	4.84295	1	0.941176	0.962963	1	6.41069e-11
Diff(182,30b)	5.09309	0.961538	0.904762	0.925926	0.95	5.61435e-10
Diff(182,301)	1.8992	1	0.8	0.814815	1	9.4096e-09
Diff(182,324-3p)	1.008	0.962963	0.928571	0.962963	0.928571	1.07548e-08
Diff(25,422b)	3.23016	0.925926	0.782609	0.833333	0.9	2.74558e-07
Diff(25,30e-5p)	-1.44539	0.925926	0.777778	0.862069	0.875	1.69533e-06
Diff(25,301)	3.21667	0.892857	0.772727	0.833333	0.85	1.95604e-06
Diff(26b,30e-5p)	-3.60523	1	1	1	1	3.77099e-12
Diff(26b,27b)	-5.41486	1	1	1	1	6.59924e-12
Diff(26b,27a)	-3.76277	0.965517	1	1	0.944444	1.02875e-11
Diff(26b,30a-5p)	-1.571	0.933333	1	1	0.9	2.59924e-11
Diff(26b,30d)	-2.71181	1	0.941176	0.964286	1	4.07953e-11
Diff(26b,422a)	-6.88809	0.903226	1	1	0.842105	6.44611e-10
Diff(26b,660)	-3.12532	0.925926	0.833333	0.892857	0.882353	2.63415e-07
Diff(26b,324-3p)	-5.50516	0.96	0.764706	0.857143	0.928571	1.13847e-06
Diff(27b,422b)	-1.35308	1	1	1	1	2.89966e-12
Diff(27b,30b)	-3.77905	1	0.9375	0.966667	1	4.63946e-11
Diff(27a,422b)	1.35502	1	0.857143	0.9	1	1.81947e-10
Diff(27b,301)	0.197469	1	0.75	0.833333	1	4.49564e-08
Diff(27a,30b)	-2.00525	0.903226	0.882353	0.933333	0.833333	8.47154e-08
Diff(301,30e-5p)	1.96493	1	0.941176	0.965517	1	2.62903e-11
Diff(301,30a-5p)	3.59306	1	0.833333	0.866667	1	2.25465e-10
Diff(301,30d)	2.25706	0.931034	0.823529	0.9	0.875	2.82444e-07
Diff(30a-5p,422b)	3.71249	1	0.909091	0.933333	1	4.90142e-12
Diff(30a-5p,30e-5p)	-1.5953	1	0.842105	0.896552	1	1.49855e-09
Diff(30b,30e-5p)	-1.9159	1	1	1	1	1.54649e-12
Diff(30b,30d)	-1.32038	1	0.941176	0.966667	1	1.71458e-11
Diff(30d,422b)	1.84728	0.967742	1	1	0.9375	3.1266e-11
Diff(30b,422b)	2.92735	0.892857	0.772727	0.833333	0.85	1.95604e-06
Diff(30d,92)	-5.84861	0.892857	0.722222	0.833333	0.8125	2.94994e-05
Diff(30e-5p,422b)	1.55514	1	1	1	1	1.54649e-12
Diff(30e-5p,660)	0.308403	1	0.9375	0.965517	1	6.9592e-11
Diff(30e-5p,92)	-6.27791	1	0.8	0.862069	1	7.49273e-09
Diff(30e-5p,422a)	3.87627	0.888889	0.722222	0.827586	0.8125	6.06154e-05
Diff(422a,422b)	-2.38088	1	0.95	0.966667	1	1.06091e-12
Diff(324-3p,422b)	-1.51233	1	0.875	0.933333	1	1.04388e-09
Diff(422b,660)	1.04856	0.933333	0.882353	0.933333	0.882353	2.17683e-08
Diff(422b,92)	8.39946	0.925926	0.782609	0.833333	0.9	2.74558e-07
Diff(let-7g,let-7i)	-2.31313	1	1	1	1	1.36802e-13
Diff(let-7g,106a)	-0.608757	1	0.952381	0.966667	1	4.45584e-13
Diff(let-7g,30e-5p)	-3.04259	1	1	1	1	1.54649e-12
Diff(let-7g,126pound)	-0.132546	0.965517	0.904762	0.933333	0.95	1.29665e-10
Diff(let-7g,30d)	-2.33063	1	0.888889	0.933333	1	1.54313e-10
Diff(let-7g,182)	6.16786	0.961538	0.904762	0.925926	0.95	5.61435e-10
Diff(let-7g,30a-5p)	-1.32266	0.933333	0.9	0.933333	0.9	1.76644e-09
Diff(let-7g,27b)	-5.19701	1	0.833333	0.9	1	2.36613e-09
Diff(let-7g,25)	-1.34465	0.962963	0.826087	0.866667	0.95	5.11055e-09
Diff(let-7g,27a)	-3.04999	0.962963	0.809524	0.866667	0.944444	2.22885e-08
Diff(let-7i,15b)	-0.404827	1	1	1	1	3.54742e-13
Diff(let-7i,182)	3.96563	1	1	1	1	5.8279e-13
Diff(let-7i,422b)	2.15869	1	0.9	0.933333	1	2.59924e-11
Diff(let-7i,26b)	-2.58841	0.933333	1	1	0.888889	1.54313e-10
Diff(let-7i,142-3p)	-2.42913	0.965517	0.894737	0.933333	0.944444	6.81e-10
Diff(let-7i,15a)	3.28116	1	0.782609	0.833333	1	4.60325e-09
Diff(let-7i,181c)	5.16308	0.961538	0.772727	0.833333	0.944444	9.46668e-08
Diff(let-7i,126)	-2.6367	0.925926	0.842105	0.892857	0.888889	1.22299e-07
Diff(let-7i,30b)	-1.20182	0.928571	0.8	0.866667	0.888889	2.54933e-07
